# Supplementary material for: Sulconazole Induces PANoptosis by Triggering Oxidative Stress and Inhibiting Glycolysis to Increase Radiosensitivity in Esophageal Cancer
Source: PubMed Central journal article supplement (PMC10205543; doi:10.1016/j.mcpro.2023.100551), 2023-04-17
Supplement: mmc5.pdf [file mmc5.pdf]

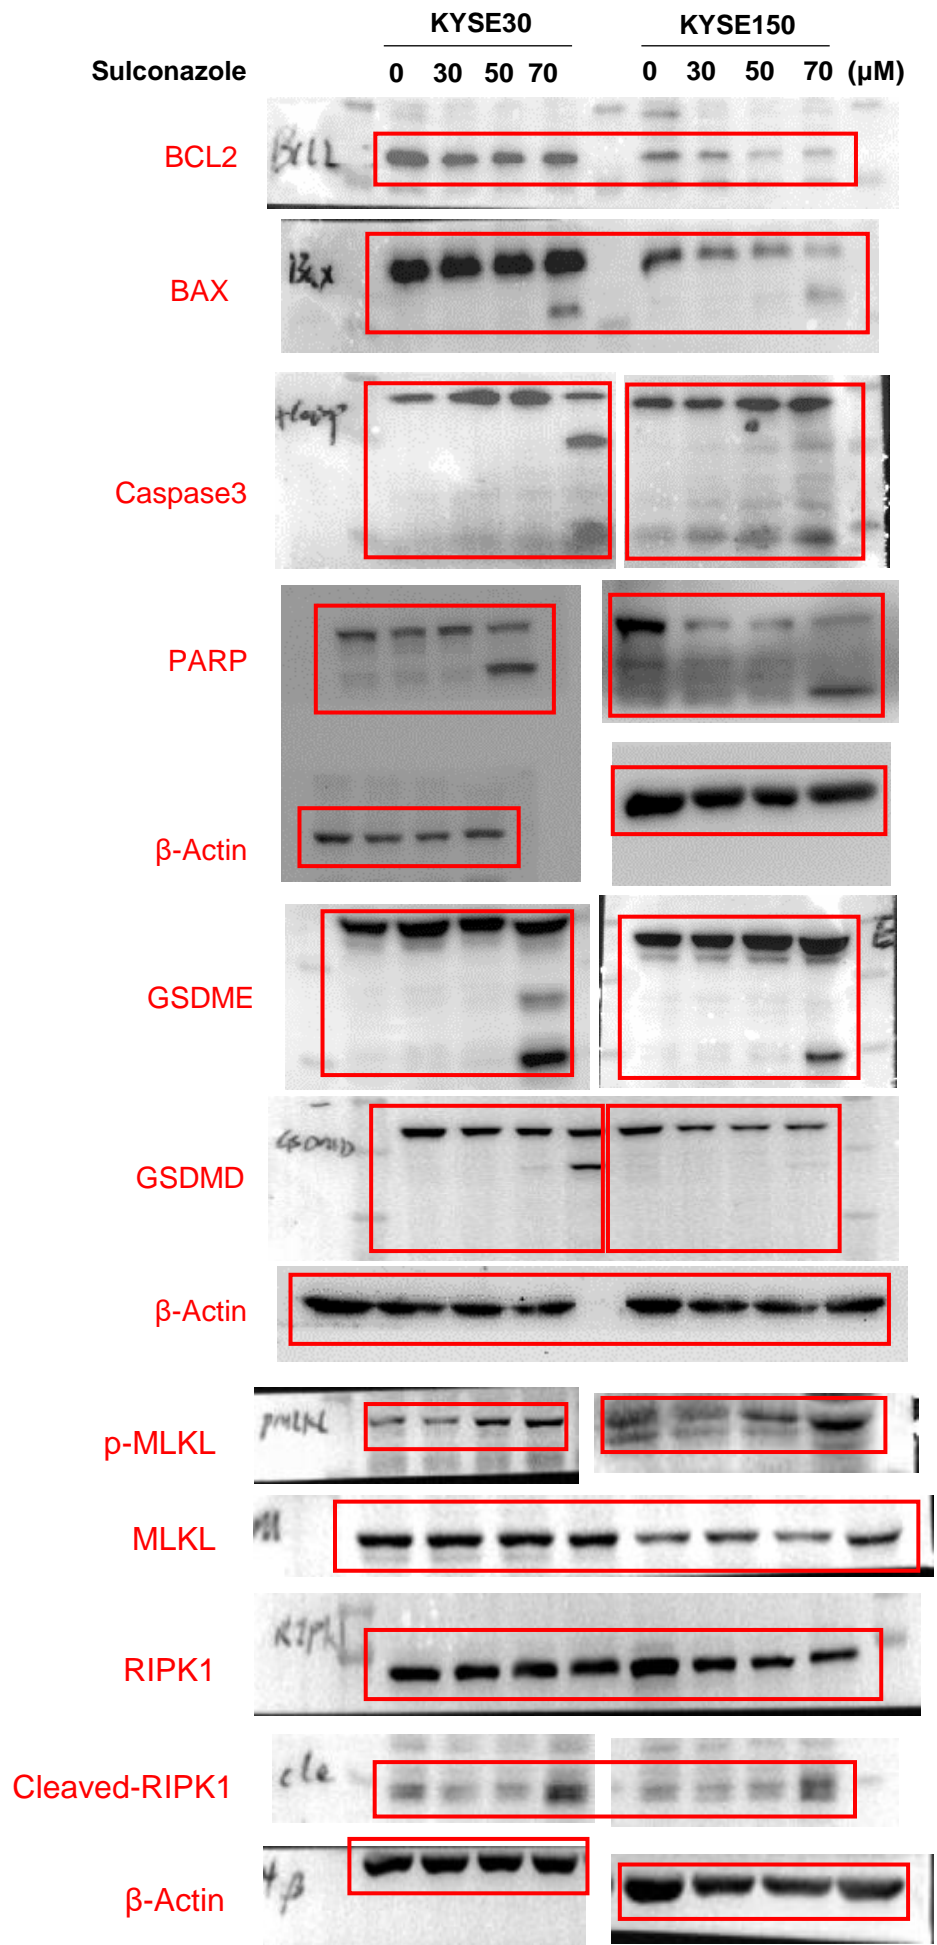

**Figure S1.** Uncropped Western Blot Images for Figure 4A.

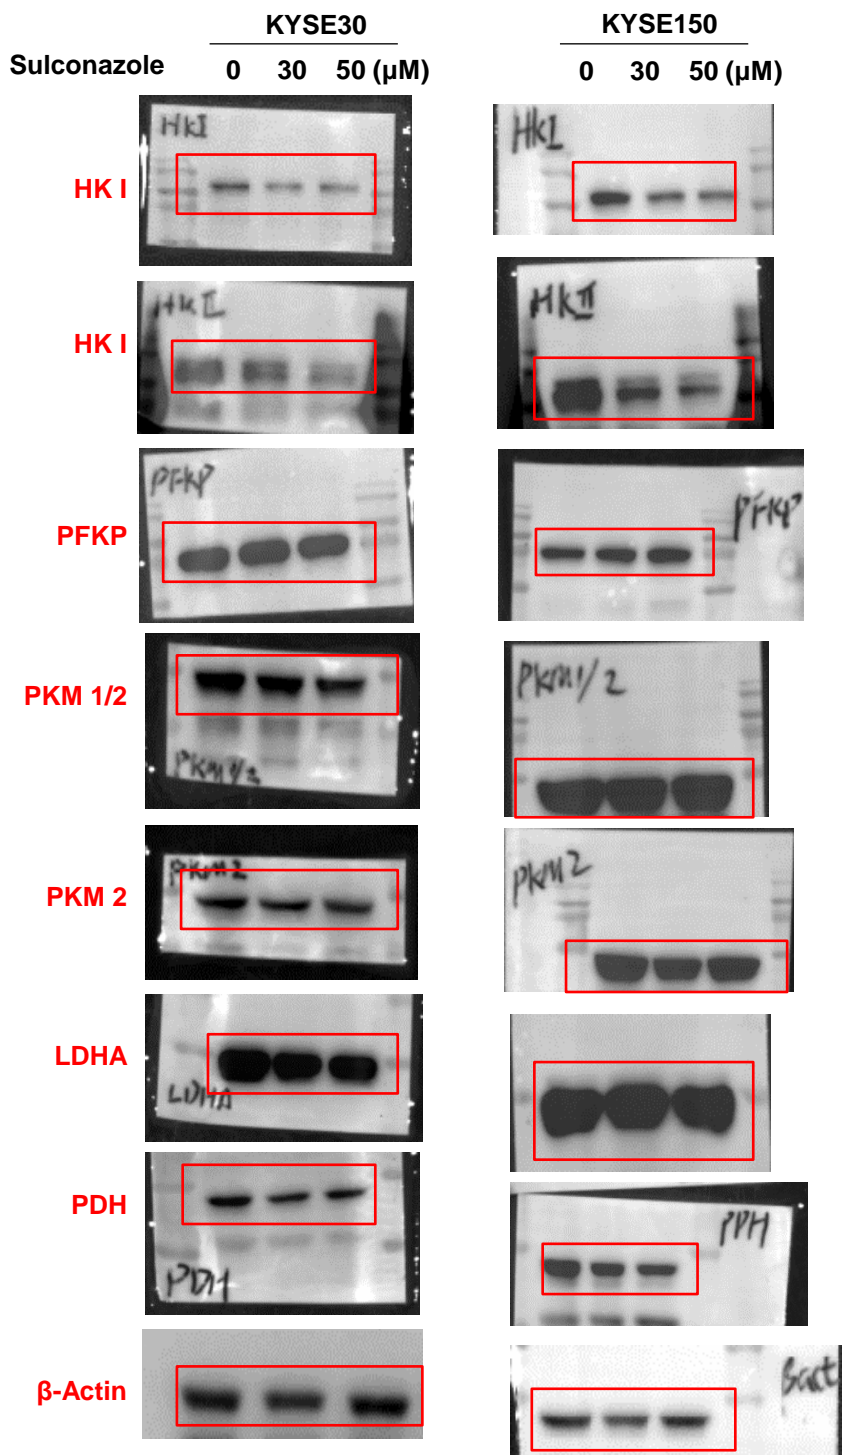

**Figure S2.** Uncropped Western Blot Images for Figure 5G.

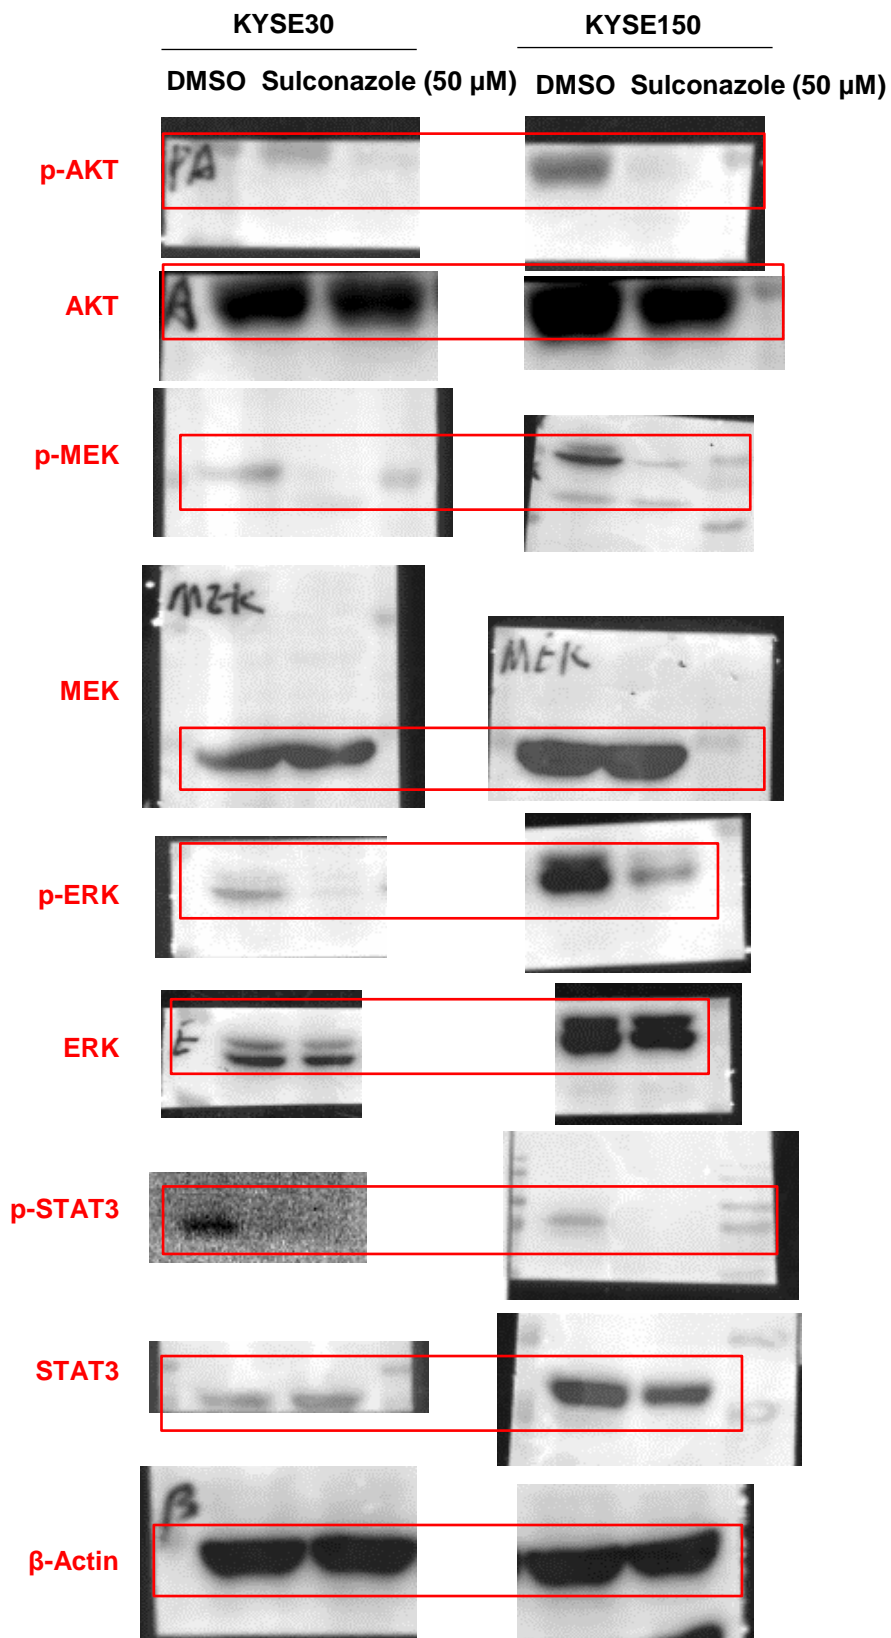

**Figure S3.** Uncropped Western Blot Images for Figure 5H.

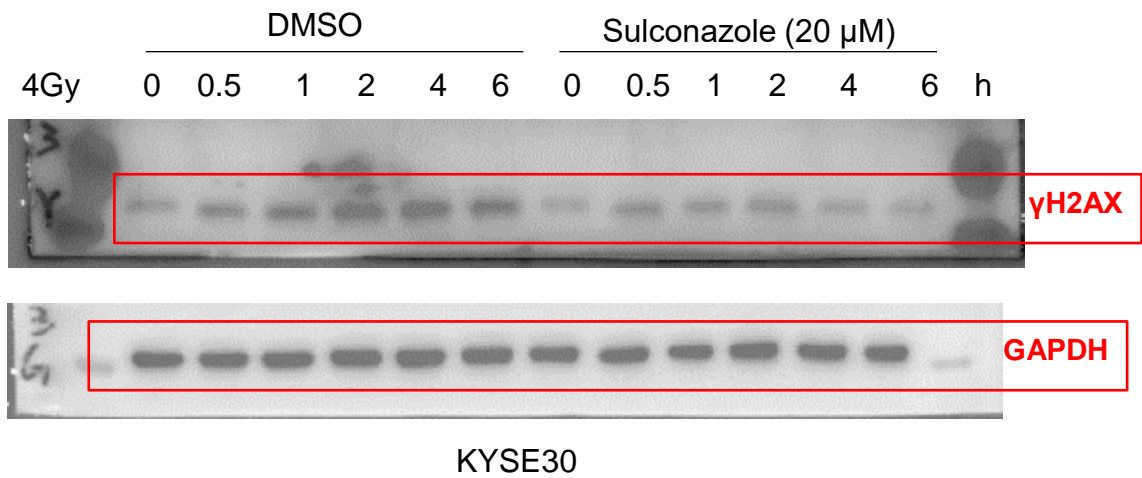

**Figure S4.** Uncropped Western Blot Images for Figure 6F.

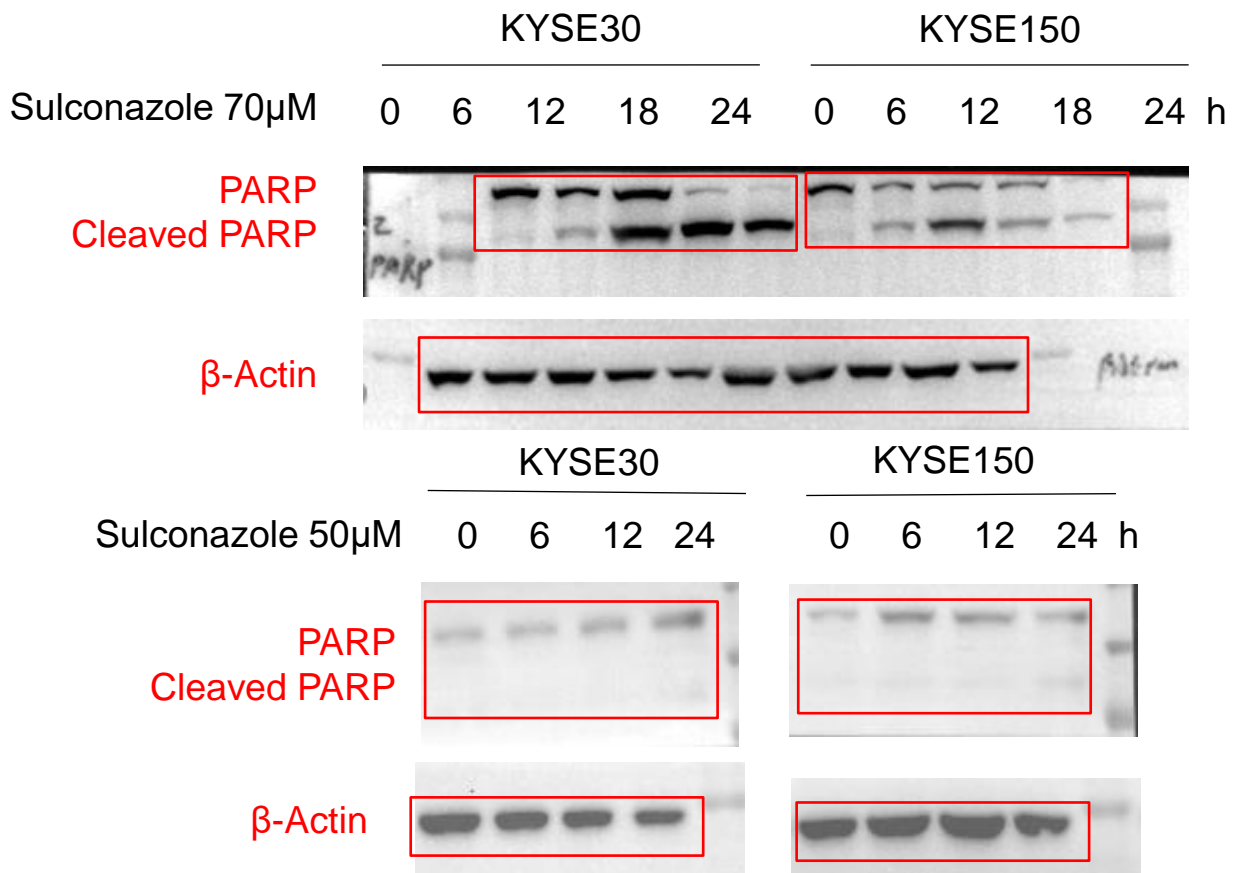

**Figure S5.** Uncropped Western Blot Images for Figure S1 B, D.

|                                  | KYSE30 |   |   |   | KYSE150 |   |   |   |
|----------------------------------|--------|---|---|---|---------|---|---|---|
| Sulconazole 70 ( $\mu\text{M}$ ) | -      | + | - | + | -       | + | - | + |
| Z-VAD                            | -      | - | + | + | -       | - | + | + |

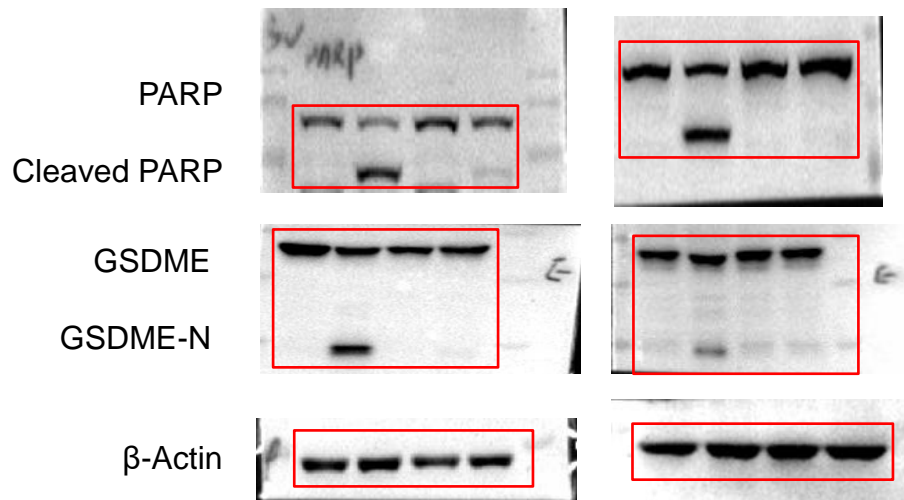

**Figure S6.** Uncropped Western Blot Images for Figure S1 E.
